# Supplementary material for: Evaluation of Salvadora persica L. and green tea anti-plaque effect: a randomized controlled crossover clinical trial
Source: PubMed Central journal article supplement (PMC5131433; doi:10.1186/s12906-016-1487-0), 2016-12-01
Supplement: 12906_2016_1487_MOESM2_ESM.pdf [file 12906_2016_1487_MOESM2_ESM.pdf]

## Additional file 2- Raw data and statistics of intra-examiner calibration

| Plaque index scoring |         |
|----------------------|---------|
| Hayder1              | Hayder2 |
| 5                    | 5       |
| 2                    | 2       |
| 1                    | 1       |
| 5                    | 2       |
| 3                    | 3       |
| 2                    | 2       |
| 2                    | 2       |
| 2                    | 2       |
| 0                    | 0       |
| 5                    | 5       |
| 0                    | 0       |
| 2                    | 2       |
| 4                    | 3       |
| 2                    | 2       |
| 0                    | 0       |
| 2                    | 2       |
| 0                    | 0       |
| 1                    | 1       |
| 1                    | 2       |
| 1                    | 2       |
| 0                    | 0       |
| 1                    | 1       |
| 0                    | 0       |
| 3                    | 3       |
| 4                    | 4       |
| 2                    | 2       |
| 1                    | 1       |
| 2                    | 2       |
| 2                    | 1       |
| 2                    | 2       |
| 2                    | 2       |
| 3                    | 3       |
| 3                    | 3       |
| 2                    | 2       |
| 2                    | 2       |
| 0                    | 2       |
| 2                    | 2       |
| 2                    | 2       |
| 3                    | 3       |
| 2                    | 2       |
| 2                    | 2       |
| 0                    | 0       |
| 3                    | 3       |

### Statistics by Kappa test in SPSS

#### Case Processing Summary

|           | Cases |         |         |         |       |         |
|-----------|-------|---------|---------|---------|-------|---------|
|           | Valid |         | Missing |         | Total |         |
|           | N     | Percent | N       | Percent | N     | Percent |
| Hayder1 * |       |         |         |         |       |         |
| Hayder2   | 48    | 9.1%    | 478     | 90.9%   | 526   | 100.0%  |

#### Symmetric Measures

|                            | Value | Asymp. Std. Error <sup>a</sup> | Approx. T <sup>b</sup> | Approx. Sig. |
|----------------------------|-------|--------------------------------|------------------------|--------------|
| Measure of Kappa Agreement | .827  | .066                           | 10.670                 | .000         |
| N of Valid Cases           | 48    |                                |                        |              |

a. Not assuming the null hypothesis.

b. Using the asymptotic standard error assuming the null hypothesis.
