# Supplementary material for: Evaluation of Salvadora persica L. and green tea anti-plaque effect: a randomized controlled crossover clinical trial
Source: Springer Nature journal article supplement (doi:10.1186/s12906-016-1487-0), 2016-12-01
Supplement: MOESM1 [file 11105930]

Additional file 1 – Raw data of sample size, power and effect size of the study

Sample size calculation using G\*Power software (version 3.1.9.2)

Raw data of the pilot study

| Patient name | Mean plaque index |       |       |
|--------------|-------------------|-------|-------|
|              | Placebo           | CHX   | Test  |
| Mazin        | 2.24              | 1.78  | 1.22  |
| Sadam        | 1.269             | 1.288 | 0.884 |
| Zohaib       | 1.517             | 1.375 | 1.232 |
| Nashwan      | 0.892             | 0.91  | 0.178 |
| Tamem        | 1.714             | 1.5   | 1.017 |
| Average      | 1.526             | 1.371 | 0.906 |
| SD           | 0.503             | 0.318 | 0.432 |

[1] -- Tuesday, October 13, 2015 -- 21:05:31

t tests – Means: Wilcoxon–Mann–Whitney test (two groups)

Options: A.R.E. method

Analysis: A priori: Compute required sample size

Input: Tail(s) = One  
Parent distribution = Normal  
Effect size d = 1.3223961  
 $\alpha$  err prob = 0.05  
Power (1– $\beta$  err prob) = 0.95  
Allocation ratio N2/N1 = 1

Output: Noncentrality parameter  $\delta$  = 3.4189777  
Critical t = 1.7088367  
Df = 24.7380304  
Sample size group 1 = 14  
Sample size group 2 = 14  
Total sample size = 28  
Actual power = 0.9533660

**power and effect size of the study calculation using G\*Power software (version 3.1.9.2)**

- 1- placebo & CHX
- 2- placebo & test
- 3- CHX & test

[1] -- Tuesday, October 13, 2015 -- 19:58:13

**t tests** – Means: Wilcoxon–Mann–Whitney test (two groups)

**Options:** A.R.E. method  
**Analysis:** Post hoc: Compute achieved power  
**Input:** Tail(s) = One  
Parent distribution = Normal  
Effect size d = 0.2873942  
 $\alpha$  err prob = 0.05  
Sample size group 1 = 14  
Sample size group 2 = 14  
**Output:** Noncentrality parameter  $\delta$  = 0.7430409  
Critical t = 1.7088367  
Df = 24.7380304  
Power (1- $\beta$  err prob) = 0.1782583

[2] -- Tuesday, October 13, 2015 -- 19:59:18

**t tests** – Means: Wilcoxon–Mann–Whitney test (two groups)

**Options:** A.R.E. method  
**Analysis:** Post hoc: Compute achieved power  
**Input:** Tail(s) = One  
Parent distribution = Normal  
Effect size d = 1.1580331  
 $\alpha$  err prob = 0.05  
Sample size group 1 = 14  
Sample size group 2 = 14  
**Output:** Noncentrality parameter  $\delta$  = 2.9940268  
Critical t = 1.7088367  
Df = 24.7380304  
Power (1- $\beta$  err prob) = 0.8971951

[3] -- Tuesday, October 13, 2015 -- 20:00:41

**t tests** – Means: Wilcoxon–Mann–Whitney test (two groups)

**Options:** A.R.E. method  
**Analysis:** Post hoc: Compute achieved power  
**Input:** Tail(s) = One  
Parent distribution = Normal  
Effect size d = 1.0773888  
 $\alpha$  err prob = 0.05  
Sample size group 1 = 14  
Sample size group 2 = 14  
**Output:** Noncentrality parameter  $\delta$  = 2.7855257  
Critical t = 1.7088367  
Df = 24.7380304  
Power (1- $\beta$  err prob) = 0.8561572
