# Supplementary material for: Evaluation of Salvadora persica L. and green tea anti-plaque effect: a randomized controlled crossover clinical trial
Source: Springer Nature journal article supplement (doi:10.1186/s12906-016-1487-0), 2016-12-01
Supplement: MOESM3 [file 11105930]

**Additional file 3- Raw data and statistics of means PI of participants for placebo (H2O), test and chlorhexidine (CHX) mouth rinses**

**Raw data**

| Patient | mouth rinse | mean PI |
|---------|-------------|---------|
| 1       | placebo     | 2.24    |
| 1       | CHX         | 1.78    |
| 1       | Test        | 1.22    |
| 2       | placebo     | 0.892   |
| 2       | CHX         | 0.91    |
| 2       | Test        | 0.178   |
| 3       | placebo     | 1.269   |
| 3       | CHX         | 1.288   |
| 3       | Test        | 0.884   |
| 4       | placebo     | 1.714   |
| 4       | CHX         | 1.5     |
| 4       | Test        | 1.017   |
| 5       | placebo     | 1.517   |
| 5       | CHX         | 1.375   |
| 5       | Test        | 1.232   |
| 6       | placebo     | 0.75    |
| 6       | CHX         | 0.66    |
| 6       | Test        | 0.214   |
| 7       | placebo     | 2.111   |
| 7       | CHX         | 1.87    |
| 7       | Test        | 1.296   |
| 8       | placebo     | 1.458   |
| 8       | CHX         | 1.354   |
| 8       | Test        | 0.854   |
| 9       | placebo     | 1.74    |
| 9       | CHX         | 1.185   |
| 9       | Test        | 0.759   |
| 10      | placebo     | 1.946   |
| 10      | CHX         | 1.428   |
| 10      | Test        | 1.339   |
| 11      | placebo     | 0.767   |
| 11      | CHX         | 1.089   |
| 11      | Test        | 1.178   |
| 12      | placebo     | 1.321   |
| 12      | CHX         | 1.642   |
| 12      | Test        | 0.964   |
| 13      | placebo     | 1       |
| 13      | CHX         | 1.041   |
| 13      | Test        | 0.979   |
| 14      | placebo     | 2.017   |
| 14      | CHX         | 1.446   |
| 14      | Test        | 1.428   |

### Statistics of means PI of participants for test and CHX

#### Ranks

| mouthwash   | N  | Mean Rank | Sum of Ranks |
|-------------|----|-----------|--------------|
| Mean PI CHX | 14 | 18.39     | 257.50       |
| Test        | 14 | 10.61     | 148.50       |
| Total       | 28 |           |              |

#### Test Statistics<sup>b</sup>

|                                | Mean PI           |
|--------------------------------|-------------------|
| Mann-Whitney U                 | 43.500            |
| Wilcoxon W                     | 148.500           |
| Z                              | -2.504            |
| Asymp. Sig. (2-tailed)         | .012              |
| Exact Sig. [2*(1-tailed Sig.)] | .011 <sup>a</sup> |

- a. Not corrected for ties.
- b. Grouping Variable: mouthwash

### Statistics of means PI of participants for placebo and CHX

#### Ranks

| mouthwash   | N  | Mean Rank | Sum of Ranks |
|-------------|----|-----------|--------------|
| Mean PI H2O | 14 | 15.86     | 222.00       |
| CHX         | 14 | 13.14     | 184.00       |
| Total       | 28 |           |              |

#### Test Statistics<sup>b</sup>

|                                | Mean PI           |
|--------------------------------|-------------------|
| Mann-Whitney U                 | 79.000            |
| Wilcoxon W                     | 184.000           |
| Z                              | -.873             |
| Asymp. Sig. (2-tailed)         | .383              |
| Exact Sig. [2*(1-tailed Sig.)] | .401 <sup>a</sup> |

- a. Not corrected for ties.
- b. Grouping Variable: mouthwash

**Statistics of means PI of participants for placebo and test**

**Ranks**

|         | mouthwash | N  | Mean Rank | Sum of Ranks |
|---------|-----------|----|-----------|--------------|
| Mean PI | H2O       | 14 | 18.36     | 257.00       |
|         | Test      | 14 | 10.64     | 149.00       |
|         | Total     | 28 |           |              |

**Test Statistics<sup>b</sup>**

|                                | Mean PI           |
|--------------------------------|-------------------|
| Mann-Whitney U                 | 44.000            |
| Wilcoxon W                     | 149.000           |
| Z                              | -2.481            |
| Asymp. Sig. (2-tailed)         | .013              |
| Exact Sig. [2*(1-tailed Sig.)] | .012 <sup>a</sup> |

a. Not corrected for ties.

b. Grouping Variable: mouthwash
